# Supplementary material for: Organometallic gold complexes of carborane. Theoretical comparative analysis of ortho, meta, and para derivatives and luminescence studies
Source: Royal Society of Chemistry journal article supplement (doi:10.1039/b820803d), 2009-01-01
Supplement: b820803d.pdf [file b820803d.pdf]

### Supplementary Information (SI)

This section includes the optimized geometries of the gold complexes  $[(\mu-1, n-C_2B_{10}H_{10})\{Au(PPh_3)\}_2]$ , with  $n = \{2, 7, 12\}$ . The computational method consists in the B3LYP Hartree-Fock/DFT hybrid method as implemented in the suite of programmes Gaussian03 [1], with the 6-31G\* basis set for all atoms except Au, where LANL2DZ pseudopotentials are used for. Also included in this SI are the frontier orbitals in complexes  $[(\mu-1, n-C_2B_{10}H_{10})\{Au(PPh_3)\}_2]$ , with  $n = \{2, 7\}$ .

**Figure S1a.** Optimized geometry for complex  $[(\mu-1,2-C_2B_{10}H_{10})\{Au(PPh_3)\}_2]$ ,  $C_1$  symmetry. B3LYP calculations – 6-31G\* basis set for all atoms except Au; LANL2DZ pseudopotential for Au atoms.

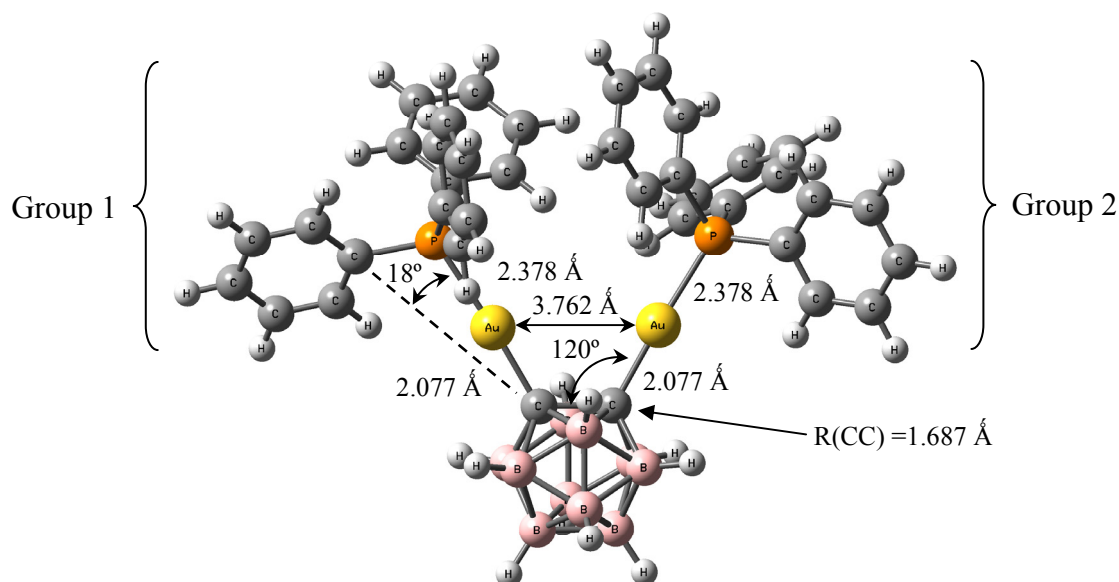

**Figure S1b.** (a) HOMO and (b) LUMO of  $[(\mu-1,2-C_2B_{10}H_{10})\{Au(PPh_3)\}_2]$  (orbital function isovalue = 0.02). Calculations with the optimized geometry at the B3LYP level – 6-31G\* for all atoms, except Au; LANL2DZ pseudopotential for Au.

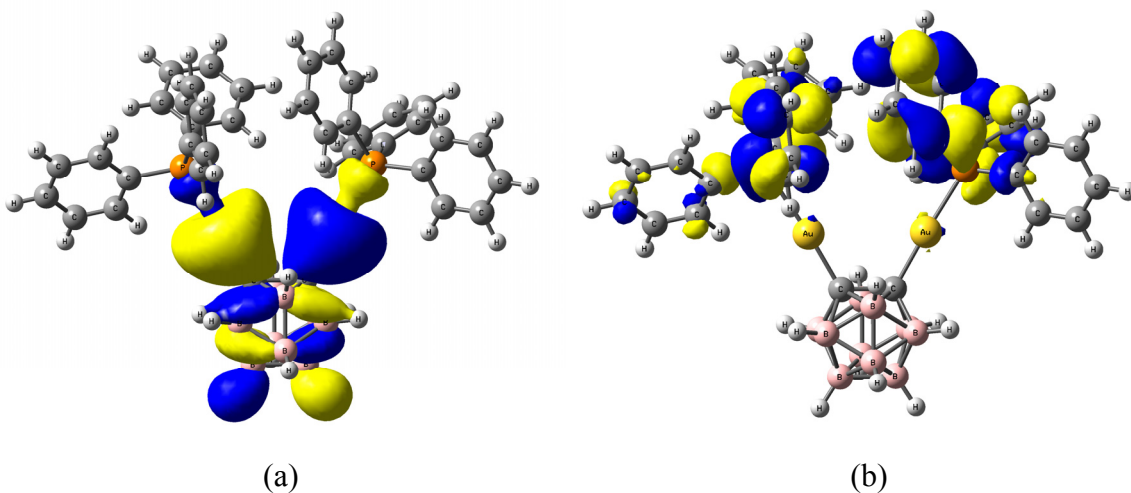

**Figure S2a.** Optimized geometry for complex  $[(\mu\text{-}1,7\text{-C}_2\text{B}_{10}\text{H}_{10})\{\text{Au}(\text{PPh}_3)\}_2]$ ,  $C_2$  symmetry. B3LYP calculations – 6-31G\* basis set for all atoms, except Au; LANL2DZ pseudopotential for Au atoms.

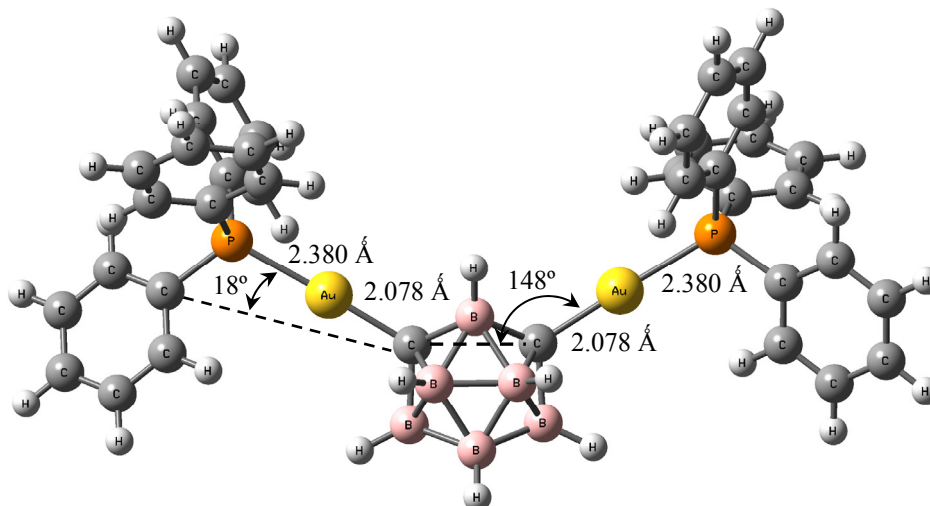

**Figure S2b.** (a) HOMO and (b) LUMO of  $[(\mu\text{-}1,7\text{-C}_2\text{B}_{10}\text{H}_{10})\{\text{Au}(\text{PPh}_3)\}_2]$  (orbital function isovalue = 0.02). Calculations with the optimized geometry at the B3LYP level – 6-31G\* for all atoms, except Au; LANL2DZ pseudopotential for Au.

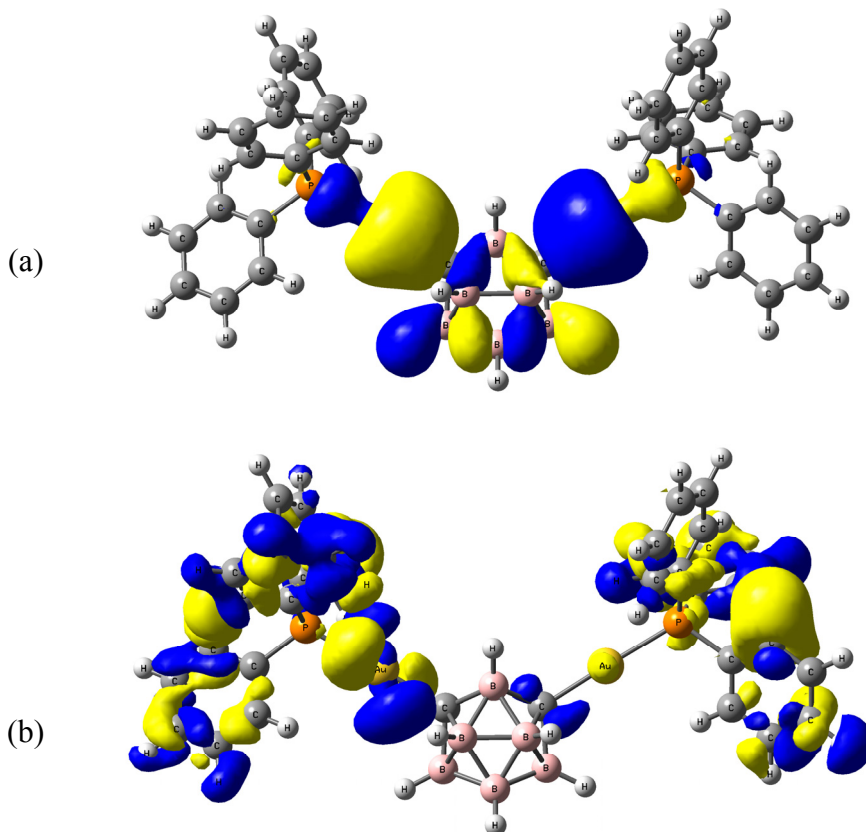

Table S1, Table S2 and Table S3 include the cartesian coordinates (in Å) of the optimized geometries for gold complexes  $[(\mu-1,n-C_2B_{10}H_{10})\{Au(PPh_3)\}_2]$ , with  $n = \{2, 7, 12\}$  respectively; B3LYP calculations – 6-31G\* basis set for all atoms, except Au; LANL2DZ pseudopotentials are used for Au atoms.

**Table S1.** Gold Complex  $[(\mu-1,2-C_2B_{10}H_{10})\{Au(PPh_3)\}_2]$

| Atom | X         | Y         | Z         |
|------|-----------|-----------|-----------|
| Au   | 1.895786  | 1.151363  | 0.004496  |
| Au   | -1.866561 | 1.134238  | 0.022353  |
| P    | 3.181546  | -0.847752 | 0.002975  |
| P    | -3.169351 | -0.855725 | 0.000273  |
| C    | 0.852453  | 2.946259  | 0.001102  |
| C    | -0.834554 | 2.936512  | 0.008681  |
| B    | 0.013241  | 3.391655  | 1.425462  |
| B    | 1.439326  | 4.296180  | 0.876556  |
| B    | 1.431004  | 4.288155  | -0.891553 |
| B    | -0.000289 | 3.378953  | -1.419464 |
| B    | -1.427397 | 4.280578  | 0.889175  |
| B    | 0.003509  | 5.171380  | 1.441342  |
| B    | 0.882902  | 5.731765  | -0.011565 |
| B    | -0.009767 | 5.158238  | -1.451356 |
| B    | -1.436060 | 4.272674  | -0.878531 |
| B    | -0.895221 | 5.722227  | -0.003402 |
| C    | 4.930968  | -2.045248 | 1.904445  |
| C    | 5.293244  | -2.424679 | 3.198280  |
| C    | 4.464731  | -2.114778 | 4.278802  |
| C    | 3.273278  | -1.417708 | 4.066141  |
| C    | 2.908666  | -1.033154 | 2.775278  |
| C    | 3.730407  | -1.353235 | 1.681708  |
| H    | 5.588282  | -2.276885 | 1.071531  |
| H    | 6.227198  | -2.955442 | 3.361536  |
| H    | 4.752912  | -2.405003 | 5.285438  |
| H    | 2.634007  | -1.157768 | 4.905106  |
| H    | 1.994939  | -0.466110 | 2.617174  |
| C    | 2.443137  | -3.596307 | -0.191135 |
| C    | 1.730677  | -4.656567 | -0.755912 |
| C    | 0.842740  | -4.424027 | -1.807591 |
| C    | 0.664286  | -3.127594 | -2.296828 |
| C    | 1.372354  | -2.065475 | -1.734206 |
| C    | 2.272629  | -2.291789 | -0.679182 |
| H    | 3.125620  | -3.784982 | 0.632120  |
| H    | 1.867749  | -5.662799 | -0.369148 |
| H    | 0.283962  | -5.249196 | -2.240467 |
| H    | -0.037069 | -2.939008 | -3.104176 |
| H    | 1.218186  | -1.056030 | -2.106816 |
| C    | 5.244861  | -1.783732 | -1.721765 |
| C    | 6.420745  | -1.623669 | -2.457306 |
| C    | 7.070825  | -0.388281 | -2.481292 |

|   |           |           |           |
|---|-----------|-----------|-----------|
| C | 6.541622  | 0.692128  | -1.771556 |
| C | 5.364883  | 0.538892  | -1.038673 |
| C | 4.711203  | -0.703950 | -1.001900 |
| H | 4.739200  | -2.744719 | -1.718022 |
| H | 6.824434  | -2.463835 | -3.015765 |
| H | 7.982821  | -0.265084 | -3.058901 |
| H | 7.036507  | 1.658720  | -1.796596 |
| H | 4.946590  | 1.387429  | -0.503493 |
| C | -3.254213 | -3.139915 | -1.698062 |
| C | -3.233715 | -3.768277 | -2.944916 |
| C | -3.066739 | -3.013659 | -4.108651 |
| C | -2.915308 | -1.627069 | -4.024101 |
| C | -2.934352 | -0.995481 | -2.779665 |
| C | -3.112805 | -1.746825 | -1.606561 |
| H | -3.371539 | -3.734657 | -0.797061 |
| H | -3.347510 | -4.847361 | -3.005921 |
| H | -3.051762 | -3.504526 | -5.078044 |
| H | -2.777931 | -1.035625 | -4.924902 |
| H | -2.802930 | 0.081660  | -2.716887 |
| C | -3.600119 | -2.856182 | 1.984736  |
| C | -3.162321 | -3.783043 | 2.933502  |
| C | -1.797393 | -3.953406 | 3.170845  |
| C | -0.866004 | -3.192790 | 2.459457  |
| C | -1.298585 | -2.262218 | 1.515350  |
| C | -2.670191 | -2.091558 | 1.265060  |
| H | -4.663838 | -2.723140 | 1.813141  |
| H | -3.890336 | -4.366799 | 3.490220  |
| H | -1.460350 | -4.671358 | 3.913674  |
| H | 0.197525  | -3.313022 | 2.645652  |
| H | -0.571574 | -1.662980 | 0.973897  |
| C | -5.976926 | -1.266002 | -0.264390 |
| C | -7.310809 | -0.968113 | 0.020427  |
| C | -7.626504 | 0.086035  | 0.879899  |
| C | -6.605812 | 0.848002  | 1.452641  |
| C | -5.271619 | 0.557510  | 1.167554  |
| C | -4.945961 | -0.508428 | 0.312344  |
| H | -5.741559 | -2.080236 | -0.942989 |
| H | -8.102391 | -1.556880 | -0.435005 |
| H | -8.665631 | 0.319235  | 1.095320  |
| H | -6.845644 | 1.677553  | 2.111556  |
| H | -4.481839 | 1.166729  | 1.599125  |
| H | 0.000559  | 2.643712  | -2.351054 |
| H | 0.021233  | 2.664395  | 2.363058  |
| H | -2.436932 | 4.145245  | 1.503413  |
| H | -2.451083 | 4.131844  | -1.481802 |
| H | 2.441639  | 4.158242  | -1.504859 |
| H | 2.455794  | 4.171814  | 1.481157  |
| H | 1.526656  | 6.734149  | -0.019315 |
| H | -0.017445 | 5.740046  | -2.490296 |
| H | -1.549854 | 6.717556  | -0.004942 |
| H | 0.004745  | 5.762679  | 2.474911  |

**Table S2.** Gold Complex  $[(\mu\text{-}1,7\text{-C}_2\text{B}_{10}\text{H}_{10})\{\text{Au}(\text{PPh}_3)\}_2]$

| Atom | X         | Y         | Z         |
|------|-----------|-----------|-----------|
| Au   | -3.109215 | -0.679975 | 0.001046  |
| Au   | 3.109237  | -0.680032 | -0.000420 |
| P    | -5.164292 | 0.520445  | 0.002376  |
| P    | 5.164276  | 0.520454  | -0.002351 |
| C    | -6.607863 | -0.548095 | -0.384240 |
| C    | -6.580706 | -1.882053 | 0.054551  |
| H    | -5.709469 | -2.260211 | 0.582865  |
| C    | -7.661309 | -2.727274 | -0.197229 |
| H    | -7.627592 | -3.758215 | 0.143367  |
| C    | -8.773123 | -2.253507 | -0.897407 |
| H    | -9.610416 | -2.915518 | -1.100792 |
| C    | -8.802820 | -0.931477 | -1.345530 |
| H    | -9.662070 | -0.561668 | -1.898456 |
| C    | -7.725664 | -0.080128 | -1.091852 |
| H    | -7.752226 | 0.943630  | -1.452971 |
| C    | -5.545581 | 1.303222  | 1.620296  |
| C    | -4.476463 | 1.789235  | 2.390582  |
| H    | -3.456600 | 1.671038  | 2.034020  |
| C    | -4.717431 | 2.408596  | 3.616847  |
| H    | -3.882635 | 2.777523  | 4.206064  |
| C    | -6.024694 | 2.538567  | 4.091374  |
| H    | -6.210420 | 3.012765  | 5.051254  |
| C    | -7.091665 | 2.048099  | 3.336195  |
| H    | -8.109414 | 2.138744  | 3.705953  |
| C    | -6.855758 | 1.432307  | 2.105485  |
| H    | -7.690109 | 1.044407  | 1.528976  |
| C    | -5.211741 | 1.880417  | -1.232029 |
| C    | -4.561080 | 1.679453  | -2.460655 |
| H    | -4.029501 | 0.749474  | -2.644857 |
| C    | -4.584780 | 2.672061  | -3.439972 |
| H    | -4.076843 | 2.506092  | -4.385832 |
| C    | -5.246790 | 3.878414  | -3.199215 |
| H    | -5.257453 | 4.654434  | -3.959761 |
| C    | -5.886648 | 4.089328  | -1.976552 |
| H    | -6.396132 | 5.029234  | -1.782019 |
| C    | -5.871124 | 3.095850  | -0.995246 |
| H    | -6.364665 | 3.271418  | -0.044175 |
| C    | 6.608083  | -0.548122 | 0.383284  |
| C    | 6.580826  | -1.881914 | -0.056017 |
| H    | 5.709391  | -2.259919 | -0.584115 |
| C    | 7.661585  | -2.727162 | 0.194982  |
| H    | 7.627797  | -3.757970 | -0.146004 |
| C    | 8.773659  | -2.253596 | 0.894889  |
| H    | 9.611077  | -2.915633 | 1.097667  |
| C    | 8.803456  | -0.931744 | 1.343522  |
| H    | 9.662909  | -0.562098 | 1.896240  |
| C    | 7.726140  | -0.080361 | 1.090619  |
| H    | 7.752785  | 0.943260  | 1.452117  |

|   |           |           |           |
|---|-----------|-----------|-----------|
| C | 5.544693  | 1.303513  | -1.620339 |
| C | 6.854661  | 1.433061  | -2.105988 |
| H | 7.689335  | 1.045313  | -1.529844 |
| C | 7.089941  | 2.049105  | -3.336688 |
| H | 8.107529  | 2.140109  | -3.706802 |
| C | 6.022548  | 2.539367  | -4.091410 |
| H | 6.207785  | 3.013764  | -5.051285 |
| C | 4.715498  | 2.408934  | -3.616431 |
| H | 3.880377  | 2.777696  | -4.205288 |
| C | 4.475157  | 1.789323  | -2.390165 |
| H | 3.455461  | 1.670781  | -2.033243 |
| C | 5.212365  | 1.880186  | 1.232281  |
| C | 4.562484  | 1.678882  | 2.461269  |
| H | 4.031132  | 0.748800  | 2.645605  |
| C | 4.586675  | 2.671277  | 3.440786  |
| H | 4.079344  | 2.505046  | 4.386925  |
| C | 5.248396  | 3.877761  | 3.199876  |
| H | 5.259435  | 4.653620  | 3.960580  |
| C | 5.887474  | 4.089010  | 1.976866  |
| H | 6.396732  | 5.029015  | 1.782221  |
| C | 5.871460  | 3.095741  | 0.995353  |
| H | 6.364405  | 3.271566  | 0.044021  |
| C | -1.341898 | -1.773556 | 0.000181  |
| B | -0.000106 | -1.190775 | 0.881088  |
| H | -0.000041 | -0.142685 | 1.436690  |
| B | -0.887335 | -2.610328 | 1.434553  |
| H | -1.562024 | -2.535373 | 2.410111  |
| B | -1.431194 | -3.495937 | -0.000017 |
| H | -2.494737 | -4.028628 | -0.000169 |
| B | -0.887352 | -2.609785 | -1.434307 |
| H | -1.562136 | -2.534969 | -2.409935 |
| B | 0.000126  | -1.190492 | -0.880486 |
| H | 0.000065  | -0.142236 | -1.435776 |
| C | 1.341899  | -1.773578 | 0.000237  |
| B | 0.887340  | -2.610262 | 1.434463  |
| H | 1.562140  | -2.535763 | 2.410102  |
| B | 0.000024  | -4.054957 | 0.892916  |
| H | 0.000012  | -5.058185 | 1.534008  |
| B | -0.000071 | -4.054673 | -0.893214 |
| H | -0.000087 | -5.057696 | -1.534627 |
| B | 0.887319  | -2.609892 | -1.434403 |
| H | 1.562002  | -2.534663 | -2.409945 |
| B | 1.431158  | -3.495970 | -0.000120 |
| H | 2.494690  | -4.028682 | -0.000145 |

**Table S3.** Gold Complex  $[(\mu\text{-}1,12\text{-C}_2\text{B}_{10}\text{H}_{10})\{\text{Au}(\text{PPh}_3)\}_2]$

| Atom | X         | Y         | Z         |
|------|-----------|-----------|-----------|
| Au   | -3.657607 | -0.037497 | -0.010171 |
| B    | -0.740018 | -0.504667 | -1.427900 |
| H    | -1.328249 | -0.849612 | -2.401232 |
| B    | -0.731575 | -1.517665 | 0.025816  |
| H    | -1.314246 | -2.553430 | 0.043193  |
| B    | -0.753376 | -0.449003 | 1.439042  |
| H    | -1.350959 | -0.756386 | 2.419144  |
| B    | -0.775216 | 1.224972  | 0.858531  |
| H    | -1.388396 | 2.058868  | 1.442763  |
| B    | -0.767120 | 1.190562  | -0.913193 |
| H    | -1.374354 | 2.001142  | -1.535151 |
| C    | -1.579406 | -0.023586 | -0.006981 |
| C    | -6.799378 | -1.561310 | -0.614754 |
| C    | -8.002876 | -1.585983 | -1.335390 |
| H    | -8.518059 | -0.658582 | -1.566605 |
| C    | -8.537959 | -2.801115 | -1.767503 |
| H    | -9.468229 | -2.809664 | -2.329064 |
| C    | -7.877922 | -3.998592 | -1.485718 |
| H    | -8.293638 | -4.942272 | -1.828318 |
| C    | -6.676858 | -3.981158 | -0.772806 |
| H    | -6.153228 | -4.908918 | -0.560350 |
| C    | -6.136020 | -2.769507 | -0.343238 |
| H    | -5.191468 | -2.758788 | 0.194418  |
| C    | -6.738307 | 1.336411  | -1.049704 |
| C    | -6.037186 | 1.707023  | -2.208753 |
| H    | -5.095270 | 1.220873  | -2.448886 |
| C    | -6.537524 | 2.705692  | -3.044545 |
| H    | -5.984829 | 2.986530  | -3.936569 |
| C    | -7.734724 | 3.350579  | -2.726592 |
| H    | -8.118992 | 4.134578  | -3.373468 |
| C    | -8.431968 | 2.994778  | -1.570177 |
| H    | -9.359169 | 3.500479  | -1.314515 |
| C    | -7.937638 | 1.992879  | -0.733226 |
| H    | -8.479415 | 1.731037  | 0.170798  |
| C    | -6.744801 | 0.265622  | 1.672065  |
| C    | -7.935741 | -0.340731 | 2.098464  |
| H    | -8.471412 | -1.013991 | 1.436019  |
| C    | -8.431344 | -0.091003 | 3.379997  |
| H    | -9.352156 | -0.569297 | 3.702818  |
| C    | -7.744031 | 0.763021  | 4.244153  |
| H    | -8.129040 | 0.951890  | 5.242540  |
| C    | -6.554377 | 1.365599  | 3.827787  |
| H    | -6.009178 | 2.021854  | 4.500240  |
| C    | -6.052380 | 1.114840  | 2.551155  |
| H    | -5.115639 | 1.569119  | 2.238720  |
| P    | -6.041353 | -0.003310 | -0.003527 |
| Au   | 3.657607  | 0.037491  | 0.010157  |

|   |          |           |           |
|---|----------|-----------|-----------|
| B | 0.740024 | 0.504652  | 1.427881  |
| H | 1.328250 | 0.849595  | 2.401215  |
| B | 0.731575 | 1.517653  | -0.025833 |
| H | 1.314245 | 2.553419  | -0.043211 |
| B | 0.753378 | 0.448992  | -1.439057 |
| H | 1.350960 | 0.756372  | -2.419160 |
| B | 0.775221 | -1.224983 | -0.858544 |
| H | 1.388396 | -2.058879 | -1.442779 |
| B | 0.767116 | -1.190577 | 0.913177  |
| H | 1.374334 | -2.001166 | 1.535133  |
| C | 1.579406 | 0.023576  | 0.006965  |
| C | 6.799364 | 1.561376  | 0.614605  |
| C | 8.002856 | 1.586130  | 1.335248  |
| H | 8.518039 | 0.658752  | 1.566557  |
| C | 8.537927 | 2.801310  | 1.767244  |
| H | 9.468192 | 2.809922  | 2.328812  |
| C | 7.877884 | 3.998750  | 1.485333  |
| H | 8.293585 | 4.942469  | 1.827843  |
| C | 6.676823 | 3.981237  | 0.772409  |
| H | 6.153201 | 4.908982  | 0.559864  |
| C | 6.135999 | 2.769542  | 0.342960  |
| H | 5.191452 | 2.758760  | -0.194705 |
| C | 6.738316 | -1.336298 | 1.049851  |
| C | 6.037204 | -1.706774 | 2.208948  |
| H | 5.095302 | -1.220582 | 2.449051  |
| C | 6.537541 | -2.705359 | 3.044841  |
| H | 5.984853 | -2.986094 | 3.936903  |
| C | 7.734727 | -3.350299 | 2.726941  |
| H | 8.118991 | -4.134234 | 3.373898  |
| C | 8.431960 | -2.994631 | 1.570480  |
| H | 9.359149 | -3.500374 | 1.314857  |
| C | 7.937627 | -1.992818 | 0.733423  |
| H | 8.479404 | -1.731083 | -0.170631 |
| C | 6.744815 | -0.265785 | -1.672032 |
| C | 7.935767 | 0.340511  | -2.098476 |
| H | 8.471444 | 1.013823  | -1.436089 |
| C | 8.431378 | 0.090657  | -3.379982 |
| H | 9.352200 | 0.568907  | -3.702839 |
| C | 7.744059 | -0.763436 | -4.244065 |
| H | 8.129075 | -0.952402 | -5.242431 |
| C | 6.554392 | -1.365957 | -3.827655 |
| H | 6.009189 | -2.022266 | -4.500052 |
| C | 6.052388 | -1.115073 | -2.551051 |
| H | 5.115636 | -1.569309 | -2.238583 |
| P | 6.041354 | 0.003312  | 0.003529  |

## References

<sup>1</sup> Gaussian 03, Revision C.02, M. J. Frisch, G. W. Trucks, H. B. Schlegel, G. E. Scuseria, M. A. Robb, J. R. Cheeseman, J. A. Montgomery, Jr., T. Vreven, K. N. Kudin, J. C. Burant, J. M. Millam, S. S. Iyengar, J. Tomasi, V. Barone, B. Mennucci, M. Cossi, G. Scalmani, N. Rega, G. A. Petersson, H. Nakatsuji, M. Hada, M. Ehara, K. Toyota, R. Fukuda, J. Hasegawa, M. Ishida, T. Nakajima, Y. Honda, O. Kitao, H. Nakai, M. Klene, X. Li, J. E. Knox, H. P. Hratchian, J. B. Cross, V. Bakken, C. Adamo, J. Jaramillo, R. Gomperts, R. E. Stratmann, O. Yazyev, A. J. Austin, R. Cammi, C. Pomelli, J. W. Ochterski, P. Y. Ayala, K. Morokuma, G. A. Voth, P. Salvador, J. J. Dannenberg, V. G. Zakrzewski, S. Dapprich, A. D. Daniels, M. C. Strain, O. Farkas, D. K. Malick, A. D. Rabuck, K. Raghavachari, J. B. Foresman, J. V. Ortiz, Q.



Cui, A. G. Baboul, S. Clifford, J. Cioslowski, B. B. Stefanov, G. Liu, A. Liashenko, P. Piskorz, I. Komaromi, R. L. Martin, D. J. Fox, T. Keith, M. A. Al-Laham, C. Y. Peng, A. Nanayakkara, M. Challacombe, P. M. W. Gill, B. Johnson, W. Chen, M. W. Wong, C. Gonzalez, and J. A. Pople, Gaussian, Inc., Wallingford CT, 2004.
